# Supplementary material for: Evolution of the Ergot Alkaloid Biosynthetic Gene Cluster Results in Divergent Mycotoxin Profiles in Claviceps purpurea Sclerotia
Source: MDPI journal article supplement (doi:10.3390/toxins13120861), 2021-12-02
Supplement: s1 [file s1]

# Supplementary Materials: Evolution of the ergot alkaloid biosynthetic gene cluster results in divergent mycotoxin profiles in *Claviceps purpurea* sclerotia

Carmen Hicks, Thomas E. Witte, Amanda Sproule, Tiah Lee, Parivash Shoukouhi, Zlatko Popovic, Jim G. Menzies, Christopher N Boddy, Miao Liu, David P. Overy

**Table S1.** Origin of *C. purpurea* Isolates.

| Isolate | Identification              | Host                        | Designation | Collection Year | Province |
|---------|-----------------------------|-----------------------------|-------------|-----------------|----------|
| LM04    | <i>Cl. purpurea</i> s.s. G1 | <i>Tricosecale</i>          | DAOMC250624 | 1996            | MB       |
| LM30    | <i>Cl. purpurea</i> s.s. G1 | <i>Secale cereale</i>       | DAOMC250649 | 2000            | SK       |
| LM60    | <i>Cl. purpurea</i> s.s. G1 | <i>Avena sativa</i>         | DAOMC250680 | 2005            | MB       |
| LM207   | <i>Cl. purpurea</i> s.s. G1 | <i>Elymus repens</i>        | -           | 2014            | MB       |
| LM232   | <i>Cl. purpurea</i> s.s. G1 | <i>Phalaris canariensis</i> | DAOMC250822 | 2014            | MB       |
| LM233   | <i>Cl. purpurea</i> s.s. G1 | <i>Phalaris canariensis</i> | -           | 2014            | MB       |
| LM469   | <i>Cl. purpurea</i> s.s. G1 | <i>Triticum aestivum</i>    | -           | 2016            | ON       |
| LM474   | <i>Cl. purpurea</i> s.s. G1 | <i>Hordeum vulgare</i>      | -           | 2016            | ON       |

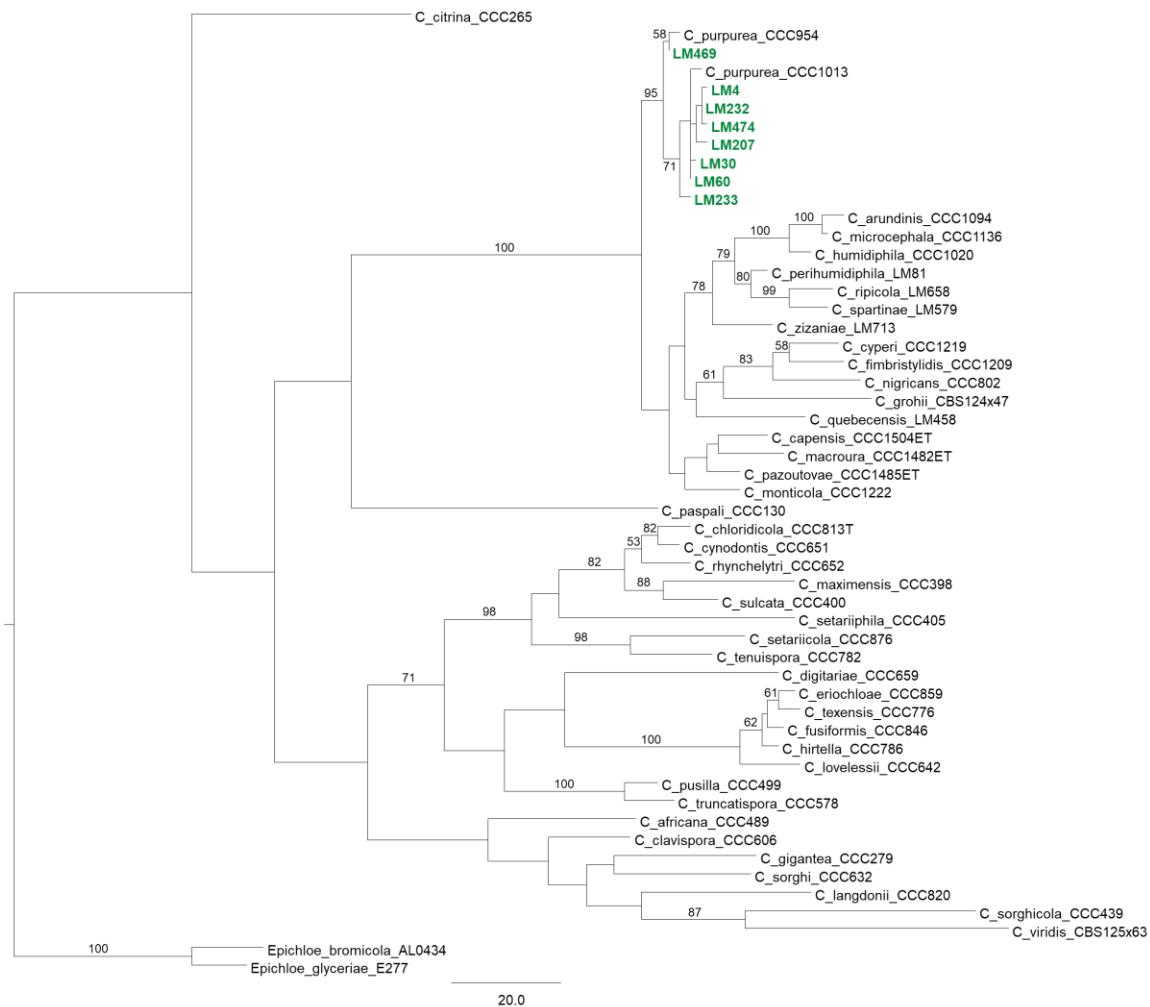

**Figure S1.** Concatenated *RPB2* & *TEF1- $\alpha$*  gene sequence MP (maximum parsimony) algorithm phylogenetic analyses of 44 *Claviceps* spp. 8 isolates used in analysis (green) cluster within in the *C. purpurea* clade.

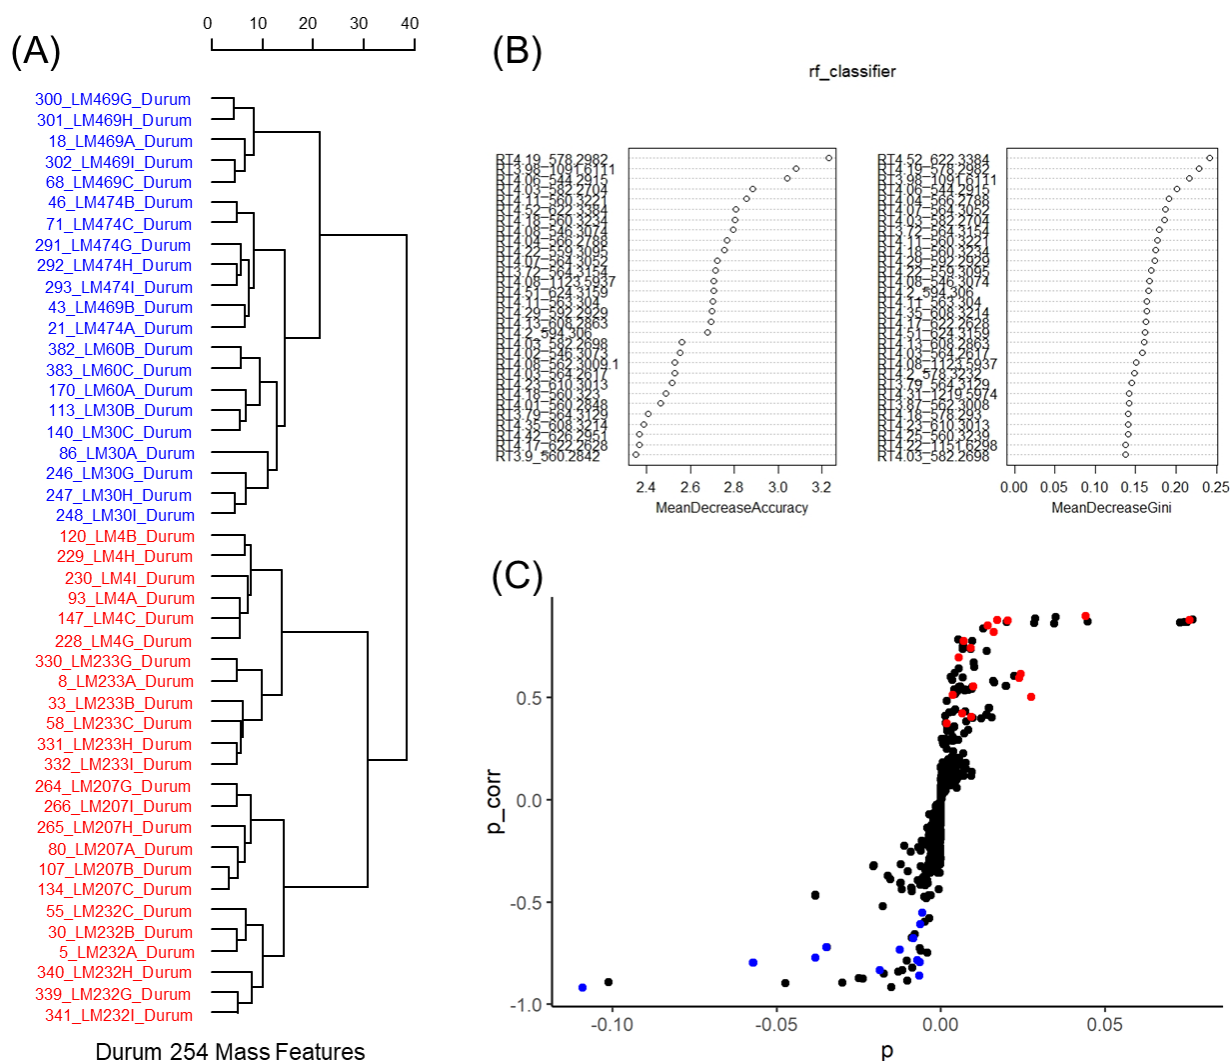

**Figure S2:** Untargeted metabolomics analysis of *C. purpurea* strains grown on Durum wheat. (A) Euclidean Ward hierarchical clustering of pseudo-binary (presence/absence) mass feature data of replicate sclerotia. Labels in Red and Blue represent specimen identified in Class 1 and Class 2 respectively with (n=6) replicates per specimen. (B) Top 30 mass features associated with class formation as determined via random forest analysis of raw data (Left: Mean decrease in accuracy and Right: Mean decrease in Gini of raw data of replicate sclerotia). (C) S-plot from OPLS-DA highlighting top 30 features identified by random forest analysis of replicate sclerotia, features in red and blue represent specimen identified in Class 1 and Class 2.

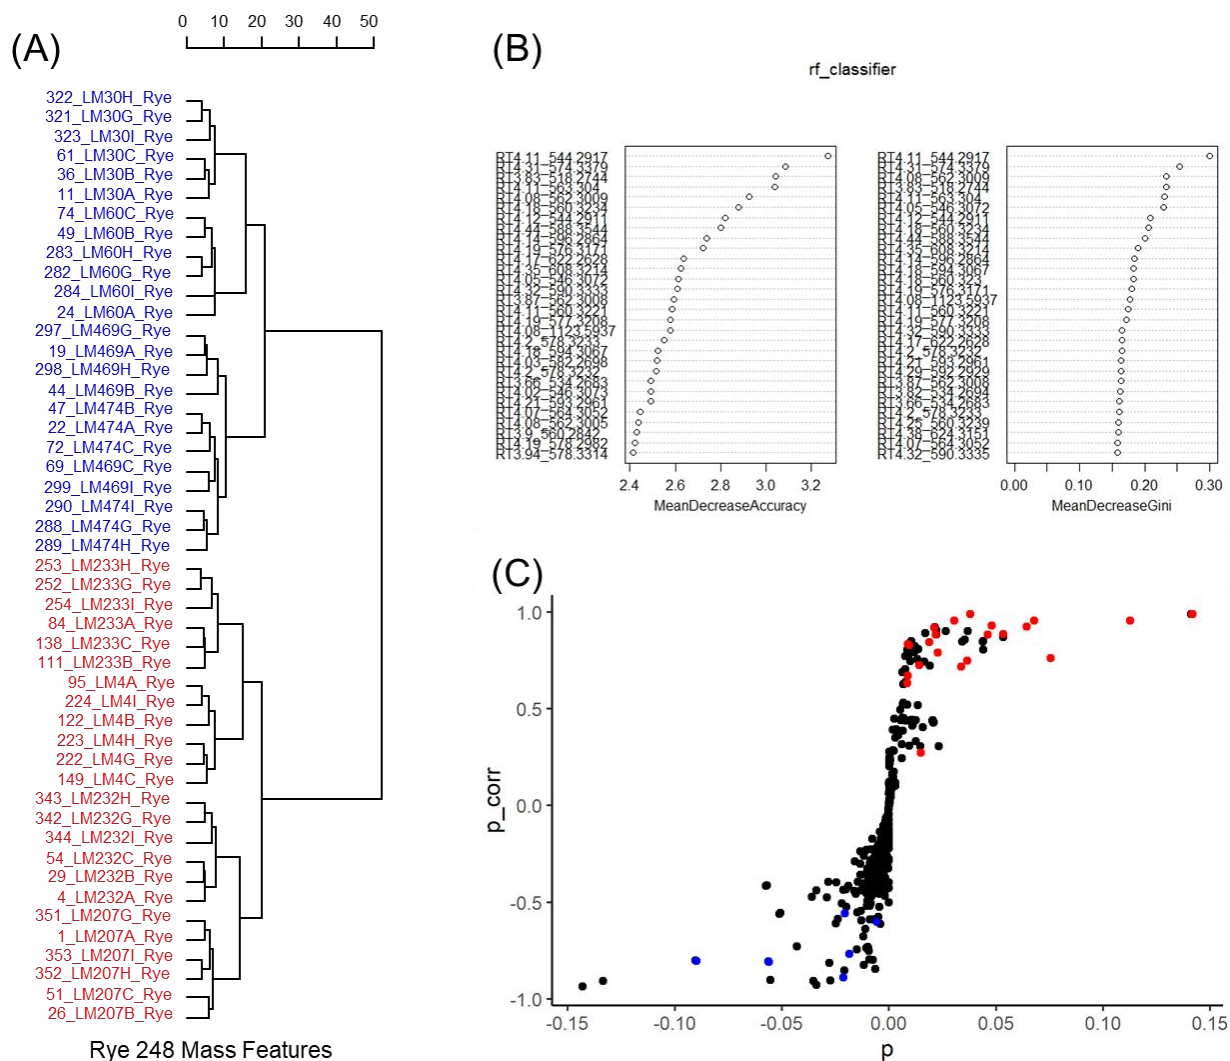

**Figure S3:** Untargeted metabolomics analysis of *C. purpurea* strains grown on rye. **(A)** Euclidean Ward hierarchical clustering of pseudo-binary (presence/absence) mass feature data of replicate sclerotia. Labels in Red and Blue represent specimen identified in Class 1 and Class 2 respectively with (n=6) replicates per specimen. **(B)** Top 30 mass features associated with class formation as determined via random forest analysis of raw data (Left: Mean decrease in accuracy and Right: Mean decrease in Gini of raw data of replicate sclerotia). **(C)** S-plot from OPLS-DA highlighting top 30 features identified by random forest analysis of replicate sclerotia, features in red and blue represent specimen identified in Class 1 and Class 2.

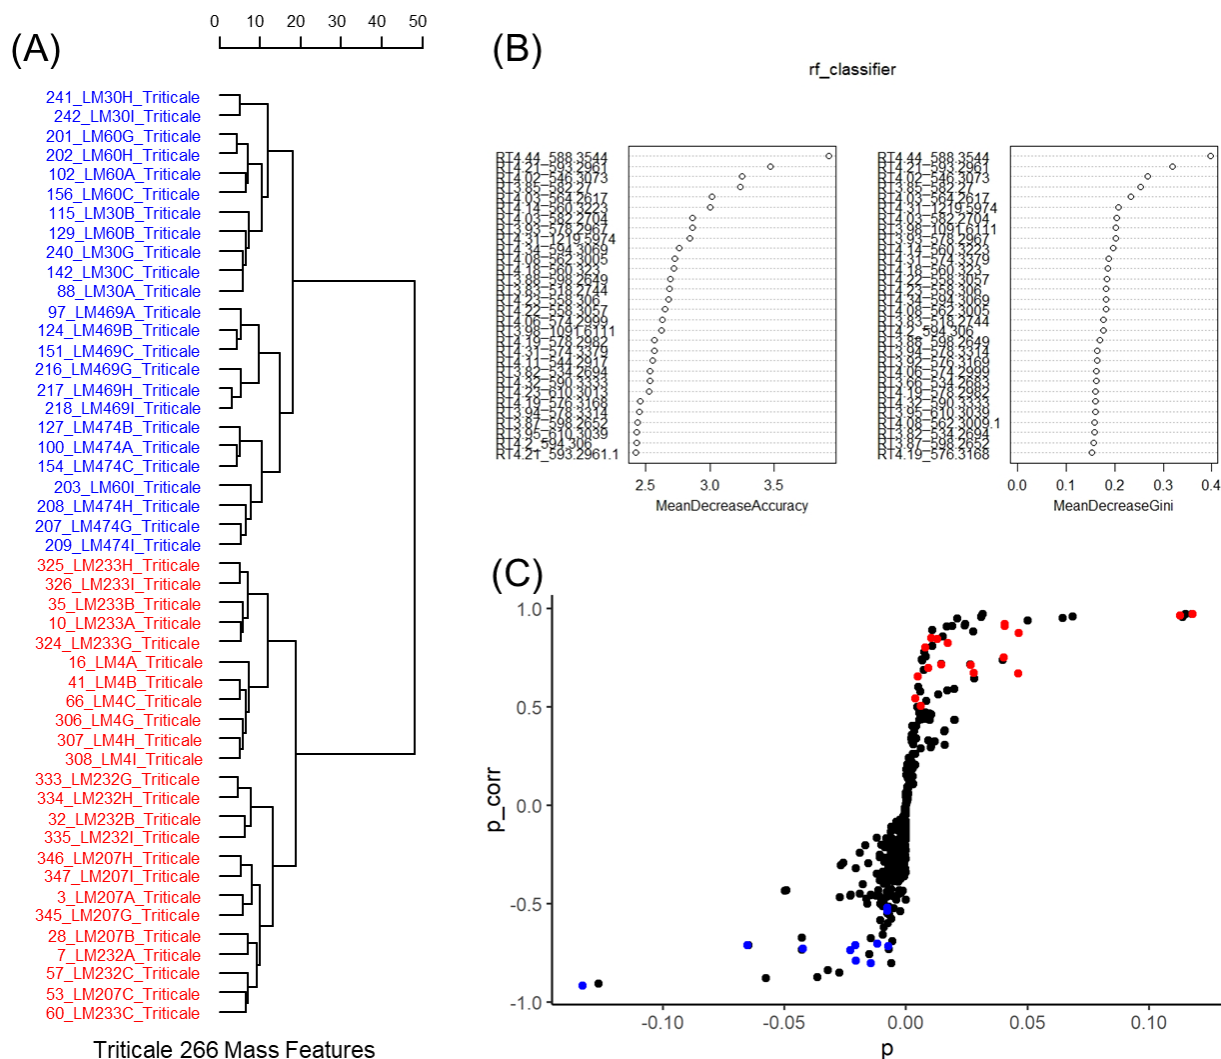

**Figure S4:** Untargeted metabolomics analysis of *C. purpurea* strains grown on tritcale. **(A)** Euclidean Ward hierarchical clustering of pseudo-binary (presence/absence) mass feature data of replicate sclerotia. Labels in Red and Blue represent specimen identified in Class 1 and Class 2 respectively with (n=6) replicates per specimen. **(B)** Top 30 mass features associated with class formation as determined via random forest analysis of raw data (Left: Mean decrease in accuracy and Right: Mean decrease in Gini of raw data of replicate sclerotia). **(C)** S-plot from OPLS-DA highlighting top 30 features identified by random forest analysis of replicate sclerotia, features in red and blue represent specimen identified in Class 1 and Class 2.

**Table S2:** Putative ergot alkaloid [M+H]<sup>+</sup> annotations of ergot alkaloid [M+H]<sup>+</sup> mass features

| Retention Time (min) | Observed [M+H] <sup>+</sup> m/z | Theoretical [M+H] <sup>+</sup> m/z | Δ(ppm)  | Formula                                                       | Putative Annotation      |
|----------------------|---------------------------------|------------------------------------|---------|---------------------------------------------------------------|--------------------------|
| 2.94                 | 269.1279                        | 269.1284                           | 1.8578  | C <sub>16</sub> H <sub>17</sub> N <sub>2</sub> O <sub>2</sub> | Lysergic Acid Derivative |
| 3.03                 | 326.1852                        | 326.1862                           | 3.0657  | C <sub>19</sub> H <sub>24</sub> N <sub>3</sub> O <sub>2</sub> | Ergometrine              |
| 3.20                 | 271.1435                        | 271.1440                           | 1.8440  | C <sub>16</sub> H <sub>19</sub> N <sub>2</sub> O <sub>2</sub> | Simple Clavine           |
| 3.22                 | 257.1645                        | 257.1648                           | 1.1666  | C <sub>16</sub> H <sub>21</sub> N <sub>2</sub> O              | Simple Clavine           |
| 3.30                 | 257.1645                        | 257.1648                           | 1.1666  | C <sub>16</sub> H <sub>21</sub> N <sub>2</sub> O              | Simple Clavine           |
| 3.34                 | 326.1853                        | 326.1862                           | 2.7592  | C <sub>19</sub> H <sub>24</sub> N <sub>3</sub> O <sub>2</sub> | Ergometrine              |
| 3.37                 | 257.1645                        | 257.1648                           | 1.1666  | C <sub>16</sub> H <sub>21</sub> N <sub>2</sub> O              | Simple Clavine           |
| 3.68                 | 548.2860                        | 548.2867                           | 1.2767  | C <sub>30</sub> H <sub>38</sub> N <sub>5</sub> O <sub>5</sub> | Isobaric w/ Ergosine     |
| 3.72                 | 564.3154                        | 564.3180                           | 4.6073  | C <sub>31</sub> H <sub>41</sub> N <sub>5</sub> O <sub>5</sub> | Dihydroergocornine       |
| 3.78                 | 548.2864                        | 548.2867                           | 0.5472  | C <sub>30</sub> H <sub>38</sub> N <sub>5</sub> O <sub>5</sub> | Isobaric w/ Ergosine     |
| 3.82                 | 534.2694                        | 534.2710                           | 2.9947  | C <sub>29</sub> H <sub>36</sub> N <sub>5</sub> O <sub>5</sub> | Ergovaline               |
| 3.85                 | 582.2700                        | 582.2710                           | 1.7174  | C <sub>33</sub> H <sub>36</sub> N <sub>5</sub> O <sub>5</sub> | Isobaric w/ Ergotamine   |
| 3.87                 | 562.3008                        | 562.3023                           | 2.6676  | C <sub>31</sub> H <sub>40</sub> N <sub>5</sub> O <sub>5</sub> | Ergocornine              |
| 3.88                 | 598.2649                        | 598.2659                           | 1.6715  | C <sub>33</sub> H <sub>35</sub> N <sub>5</sub> O <sub>6</sub> | Hydroxyergotamine        |
| 3.92                 | 562.3004                        | 562.3023                           | 3.3790  | C <sub>31</sub> H <sub>40</sub> N <sub>5</sub> O <sub>5</sub> | Isobaric w/ Ergocornine  |
| 3.92                 | 576.3169                        | 576.3180                           | 1.9087  | C <sub>32</sub> H <sub>42</sub> N <sub>5</sub> O <sub>5</sub> | Isobaric w/ Ergocryptine |
| 3.94                 | 578.3314                        | 578.3336                           | 3.8040  | C <sub>32</sub> H <sub>43</sub> N <sub>5</sub> O <sub>5</sub> | Dihydroergocryptine      |
| 3.95                 | 548.2866                        | 548.2867                           | 0.1824  | C <sub>30</sub> H <sub>38</sub> N <sub>5</sub> O <sub>5</sub> | Ergosine                 |
| 3.95                 | 610.3039                        | 610.3023                           | -2.6217 | C <sub>35</sub> H <sub>40</sub> N <sub>5</sub> O <sub>5</sub> | Isobaric w/ Ergocristine |
| 3.96                 | 532.2913                        | 532.2924                           | 2.0665  | C <sub>30</sub> H <sub>38</sub> N <sub>5</sub> O <sub>4</sub> | Ergosam                  |
| 3.98                 | 273.1600                        | 273.1597                           | -1.0983 | C <sub>16</sub> H <sub>21</sub> N <sub>2</sub> O <sub>2</sub> | Simple Clavine           |
| 4.01                 | 268.1435                        | 268.1444                           | 3.3564  | C <sub>16</sub> H <sub>18</sub> N <sub>3</sub> O              | Lysergic Acid Derivative |
| 4.02                 | 546.3073                        | 546.3074                           | 0.1830  | C <sub>31</sub> H <sub>40</sub> N <sub>5</sub> O <sub>4</sub> | Ergocornam               |
| 4.03                 | 582.2704                        | 582.2710                           | 1.0304  | C <sub>33</sub> H <sub>36</sub> N <sub>5</sub> O <sub>5</sub> | Ergotamine               |
| 4.04                 | 566.2788                        | 566.2767                           | -3.7084 | C <sub>33</sub> H <sub>36</sub> N <sub>5</sub> O <sub>4</sub> | Ergotamam                |
| 4.08                 | 546.3074                        | 546.3074                           | 0.0000  | C <sub>31</sub> H <sub>40</sub> N <sub>5</sub> O <sub>4</sub> | Isobaric w/ Ergocornam   |
| 4.08                 | 562.3005                        | 562.3023                           | 3.2011  | C <sub>31</sub> H <sub>40</sub> N <sub>5</sub> O <sub>5</sub> | Isobaric w/ Ergocornine  |
| 4.11                 | 560.3221                        | 560.3231                           | 1.7847  | C <sub>32</sub> H <sub>42</sub> N <sub>5</sub> O <sub>4</sub> | Isobaric w/ Ergocryptam  |
| 4.14                 | 560.3223                        | 560.3231                           | 1.4277  | C <sub>32</sub> H <sub>42</sub> N <sub>5</sub> O <sub>4</sub> | Isobaric w/ Ergocryptam  |
| 4.14                 | 596.2864                        | 596.2867                           | 0.5031  | C <sub>34</sub> H <sub>38</sub> N <sub>5</sub> O <sub>5</sub> | Ergostine                |
| 4.18                 | 560.3230                        | 560.3231                           | 0.1785  | C <sub>32</sub> H <sub>42</sub> N <sub>5</sub> O <sub>4</sub> | Isobaric w/ Ergocryptam  |
| 4.19                 | 576.3171                        | 576.3180                           | 1.5616  | C <sub>32</sub> H <sub>42</sub> N <sub>5</sub> O <sub>5</sub> | Ergocryptine             |
| 4.20                 | 594.3060                        | 594.3074                           | 2.3557  | C <sub>35</sub> H <sub>40</sub> N <sub>5</sub> O <sub>4</sub> | Ergocristam              |
| 4.24                 | 610.3014                        | 610.3023                           | 1.4747  | C <sub>35</sub> H <sub>40</sub> N <sub>5</sub> O <sub>5</sub> | Ergocristine             |
| 4.25                 | 560.3239                        | 560.3231                           | -1.4277 | C <sub>32</sub> H <sub>42</sub> N <sub>5</sub> O <sub>4</sub> | Isobaric w/ Ergocryptam  |
| 4.25                 | 574.3381                        | 574.3387                           | 1.0447  | C <sub>33</sub> H <sub>44</sub> N <sub>5</sub> O <sub>4</sub> | Isobaric w/ Ergoannam    |

|      |          |          |        |                                                               |                         |
|------|----------|----------|--------|---------------------------------------------------------------|-------------------------|
| 4.31 | 574.3379 | 574.3387 | 1.3929 | C <sub>33</sub> H <sub>44</sub> N <sub>5</sub> O <sub>4</sub> | Ergoannam               |
| 4.32 | 590.3335 | 590.3336 | 0.1694 | C <sub>33</sub> H <sub>44</sub> N <sub>5</sub> O <sub>5</sub> | Ergogaline              |
| 4.34 | 594.3069 | 594.3074 | 0.8413 | C <sub>35</sub> H <sub>40</sub> N <sub>5</sub> O <sub>4</sub> | Isobaric w/ Ergocristam |
| 4.35 | 608.3214 | 608.3231 | 2.7946 | C <sub>36</sub> H <sub>42</sub> N <sub>5</sub> O <sub>4</sub> | Ergosedmam              |
| 4.38 | 624.3151 | 624.3180 | 4.6451 | C <sub>36</sub> H <sub>42</sub> N <sub>5</sub> O <sub>5</sub> | Ergosedmine             |
| 4.51 | 624.3159 | 624.3180 | 3.3637 | C <sub>36</sub> H <sub>42</sub> N <sub>5</sub> O <sub>5</sub> | Ergosedminine           |

**Table S3:** Stachelhaus codes and predicted substrate specifics for all *lpsA* genes extracted from long-read genomes. \* NRPSpredictor2 (Röttig et al. 2011) was unable to predict the specificity of certain codons. In these cases, the nearest neighbour to the Stachelhaus code-based phylogeny is written in brackets, along with the number of codon sites consistent with this prediction (max 10/10). Highlighted codon residues are potentially contributing to predicted substrate specificity changes.

| Gene/domain | Strain    | Positions |     |     |     |     |     |     |     |     |     | Predictions |
|-------------|-----------|-----------|-----|-----|-----|-----|-----|-----|-----|-----|-----|-------------|
|             |           | 235       | 236 | 239 | 278 | 299 | 301 | 322 | 330 | 331 | 517 | NRPSpred2*  |
| lpsA1/aa1   | LM04      | D         | A   | I   | F   | C   | G   | G   | P   | L   | K   | ala         |
|             | Cpurp20.1 | D         | A   | I   | F   | C   | G   | G   | P   | L   | K   | ala         |
|             | LM60      | D         | A   | I   | F   | C   | G   | G   | P   | L   | K   | ala         |
|             | LM72      | D         | A   | I   | F   | C   | G   | G   | P   | L   | K   | ala         |
| lpsA1/aa2   | LM04      | D         | L   | A   | G   | V   | G   | A   | I   | I   | K   | (leu 6/10)  |
|             | Cpurp20.1 | D         | L   | V   | G   | M   | A   | A   | V   | G   | K   | phe         |
|             | LM60      | D         | L   | V   | G   | M   | A   | A   | V   | G   | K   | phe         |
|             | LM72      | D         | L   | V   | G   | M   | A   | A   | V   | G   | K   | phe         |
| lpsA1/aa3   | LM04      | D         | I   | T   | L   | V   | A   | G   | L   | I   | K   | pro         |
|             | Cpurp20.1 | D         | I   | T   | L   | V   | A   | G   | L   | I   | K   | pro         |
|             | LM60      | D         | I   | T   | L   | V   | A   | G   | L   | I   | K   | pro         |
|             | LM72      | D         | I   | T   | L   | V   | A   | G   | L   | I   | K   | pro         |
| lpsA2/aa1   | LM04      | D         | L   | F   | F   | C   | G   | G   | P   | L   | K   | ala         |
|             | Cpurp20.1 | D         | A   | V   | F   | C   | V   | G   | P   | A   | K   | ala         |
|             | LM60      | D         | A   | I   | F   | C   | G   | G   | P   | L   | K   | ala         |
|             | LM72      | D         | L   | F   | F   | C   | G   | G   | P   | L   | K   | ala         |
| lpsA2/aa2   | LM04      | D         | L   | A   | G   | M   | G   | A   | V   | A   | K   | phe         |
|             | Cpurp20.1 | D         | L   | A   | G   | M   | G   | A   | M   | I   | K   | (pro 5/10)  |
|             | LM60      | D         | L   | A   | G   | M   | G   | A   | V   | A   | K   | phe         |
|             | LM72      | D         | L   | A   | G   | M   | G   | A   | V   | A   | K   | phe         |
| lpsA2/aa3   | LM04      | D         | I   | T   | L   | V   | A   | G   | L   | I   | K   | pro         |

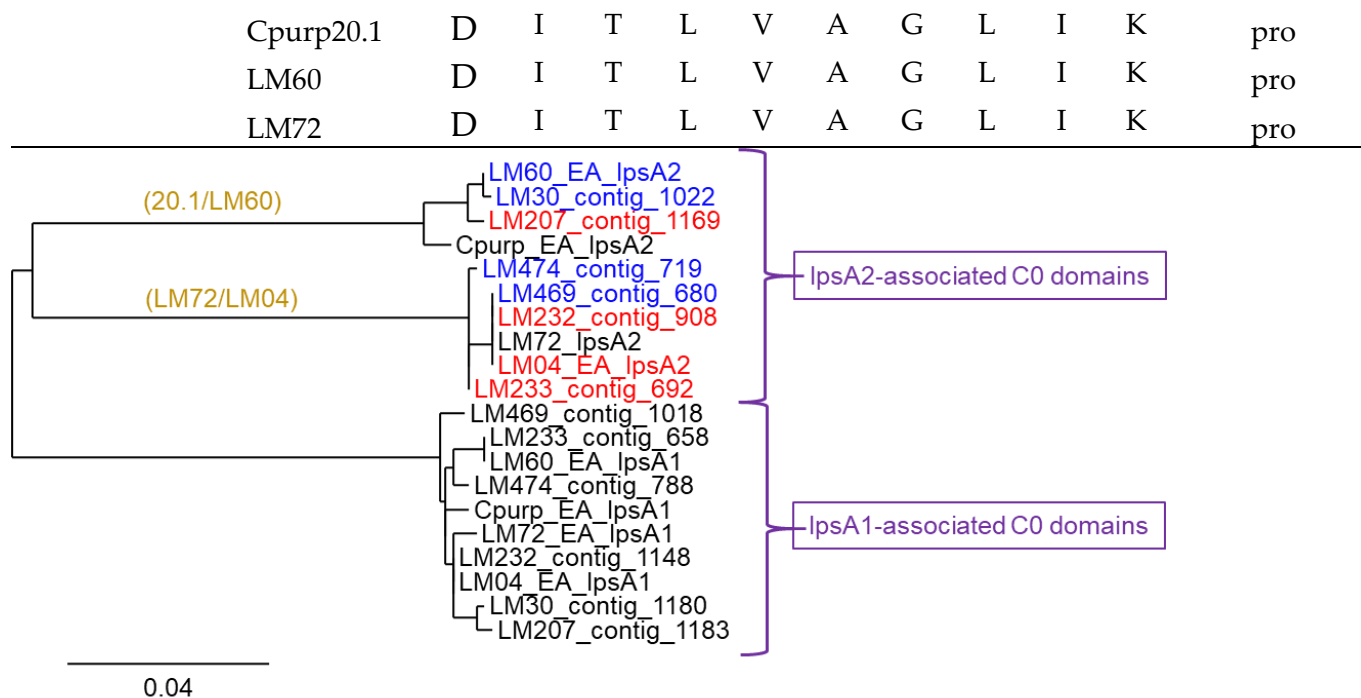

**Figure S5:** Phylogenetic tree of aligned nucleotides from C0 domains, with associated intergenic ‘genotypes’ overlaid onto branches (brown text in brackets). Genotypes are here defined as representing the highly polymorphic regions between *lpsA1* and *lpsA2*, forming two groupings either belonging to the *C. purpurea* 20.1 / LM60 strains, or as LM72 / LM04 strains, as described in Figure 7. C0 domain sequences were extracted from blast hits of the LM04 *lpsA1* C0 domain queried against all genomes used in this study. Sequences were aligned, curated and visualized using the phylogeny.fr ‘one click’ web portal (accessed September 24<sup>th</sup>, 2021). C0 domains belonging to the two putative *lpsA2* groupings are approximately 85% identical to each other, and both are approximately 83–84% similar to the monophyletic *lpsA1* C0 domains. *LpsA2*-associated leaves are coloured red or blue depending on the metabolomic class associated with the strain (red = class 1, blue = class 2).
